# Efficient algorithms for designing maximally sized orthogonal DNA sequence libraries

Gokul Gowri<sup>1,2</sup>, Kuanwei Sheng<sup>1,2</sup>, and Peng Yin<sup>1,2,✉</sup>

<sup>1</sup>Department of Systems Biology, Harvard Medical School

<sup>2</sup>Wyss Institute for Biologically Inspired Engineering at Harvard University

1 **Orthogonal sequence library design is an essential task in bio-**  
2 **engineering. Typical design approaches scale quadratically in**  
3 **the size of the candidate sequence space. As such, exhaus-**  
4 **tive searches of sequence space to maximize library size are**  
5 **computationally intractable with existing methods. Here, we**  
6 **present SeqWalk, a time and memory efficient method for de-**  
7 **signing maximally-sized orthogonal sequence libraries using the**  
8 **sequence symmetry minimization heuristic. SeqWalk encodes**  
9 **sequence design constraints in a de Bruijn graph represen-**  
10 **tation of sequence space, enabling the application of efficient**  
11 **graph traversal techniques to the problem of orthogonal DNA**  
12 **sequence design. We demonstrate the scalability of SeqWalk by**  
13 **designing a provably maximal set of  $> 10^6$  orthogonal 25nt se-**  
14 **quences in less than 20 seconds on a single standard CPU core.**  
15 **We additionally derive fundamental bounds on orthogonal se-**  
16 **quence library size under a variety of design constraints.**

17 **Correspondence:** [py@hms.harvard.edu](mailto:py@hms.harvard.edu)

## 18 Introduction

19 Orthogonal DNA sequence libraries are sets of DNA se-  
20 quences designed to have minimal crosstalk, which we  
21 broadly define as interaction with “off-target” sequences  
22 (Supplementary Note 1). In DNA-based biotechnologies, or-  
23 thogonal sequences are widely used as cellular or molecular  
24 identifiers. For example, orthogonal sequences are used to  
25 barcode protein targets in DNA-based bioimaging (1), to la-  
26 bel RNA molecules in individual cells for single-cell studies  
27 (2), and to program the assembly of components in a synthe-  
28 sis process (3), among many other applications (4–7).

29 The number of addressable features in these methods is de-  
30 pendent on the size of the orthogonal DNA sequence library  
31 that is used. For example, the multiplexity of DNA-based  
32 multiplexed epitope imaging is constrained by the number  
33 of orthogonal barcode sequences (1). Despite this, orthog-  
34 onal DNA sequence library design methods are typically ad  
35 hoc, and do not yield optimal or maximally-sized sets of se-  
36 quences. This can ultimately limit the scalability of the in-  
37 tended experimental application.

38 Existing methods for orthogonal DNA sequence library de-  
39 sign typically use the following approach: First, a set of  $S$   
40 candidate sequences is selected. Then, each pair of sequences  
41 in the candidate pool is compared to estimate crosstalk, re-  
42 sulting in an  $S \times S$  crosstalk matrix which is used to select  
43 a subset of sequences with the desired degree of orthogonal-  
44 ity (4, 6, 8). This approach requires a number of pairwise  
45 comparisons that scales quadratically in the number of can-

46 didate sequences, and becomes practically infeasible when  
47 the candidate sequence space is large. For example, screen-  
48 ing the entire space of possible 25mers would require  $\sim 10^{30}$   
49 crosstalk comparisons, which even at 1 nanosecond per com-  
50 parison would take over  $10^5$  times the age of the known uni-  
51 verse. As a result, existing methods for large orthogonal se-  
52 quence library design search only a small portion of sequence  
53 space (4, 6), precluding the design of maximally-sized li-  
54 braries. Furthermore, large library design tasks have required  
55 high performance computing resources (6).

56 Sequence-based heuristics, such as sequence symmetry min-  
57 imization (SSM), can be used to predict the orthogonality  
58 of a set of sequences. A set of sequences is considered to  
59 satisfy SSM for length  $k$  if no subsequence of length  $k$  ap-  
60 pears more than one time in the set. SSM and closely related  
61 heuristics have been widely used for the design of orthogonal  
62 sequence libraries, with extensive experimental validation in  
63 several application contexts (3, 6, 9, 10).

64 In this work we develop a scalable computational tool which  
65 enables the design of maximal orthogonal sequence libraries  
66 that minimize fundamental limits on experimental methods.  
67 We use a de Bruijn graph representation of SSM constraints,  
68 which allows the application of efficient and theoretically  
69 tractable algorithms. Using our graph-theoretic approach, we  
70 design orthogonal 25nt sequence libraries of unprecedented  
71 size ( $> 10^6$  sequences) in less than one minute on a single  
72 standard CPU core, with provable guarantees of maximality  
73 and predicted orthogonality using SSM. The tools and theo-  
74 ry presented in this work can be used to guide the design of  
75 DNA-barcoded molecular systems and to maximize the scal-  
76 ability of DNA engineering-based biotechnologies.

## 77 Results

78 **k-mer graphs for orthogonal sequence design.** We have  
79 developed SeqWalk, a computational tool for designing max-  
80 imal orthogonal sequence libraries through the application of  
81 efficient graph-based algorithms.

82 The key observation underlying SeqWalk is that orthogo-  
83 nality constraints in sequence design problems can be natu-  
84 rally encoded in de Bruijn graph representations of sequence  
85 space. De Bruijn graphs, also known as k-mer graphs, are  
86 sequence representations that have been well studied in dis-  
87 crete mathematics (11–13). A k-mer is a length  $k$  sequence.  
88 A k-mer graph has all possible k-mers as nodes, and edges  
89 between k-mers that overlap by  $k - 1$  symbols. In particular,  
90 if a k-mer  $k_1$  can be transformed into a k-mer  $k_2$  by remov-

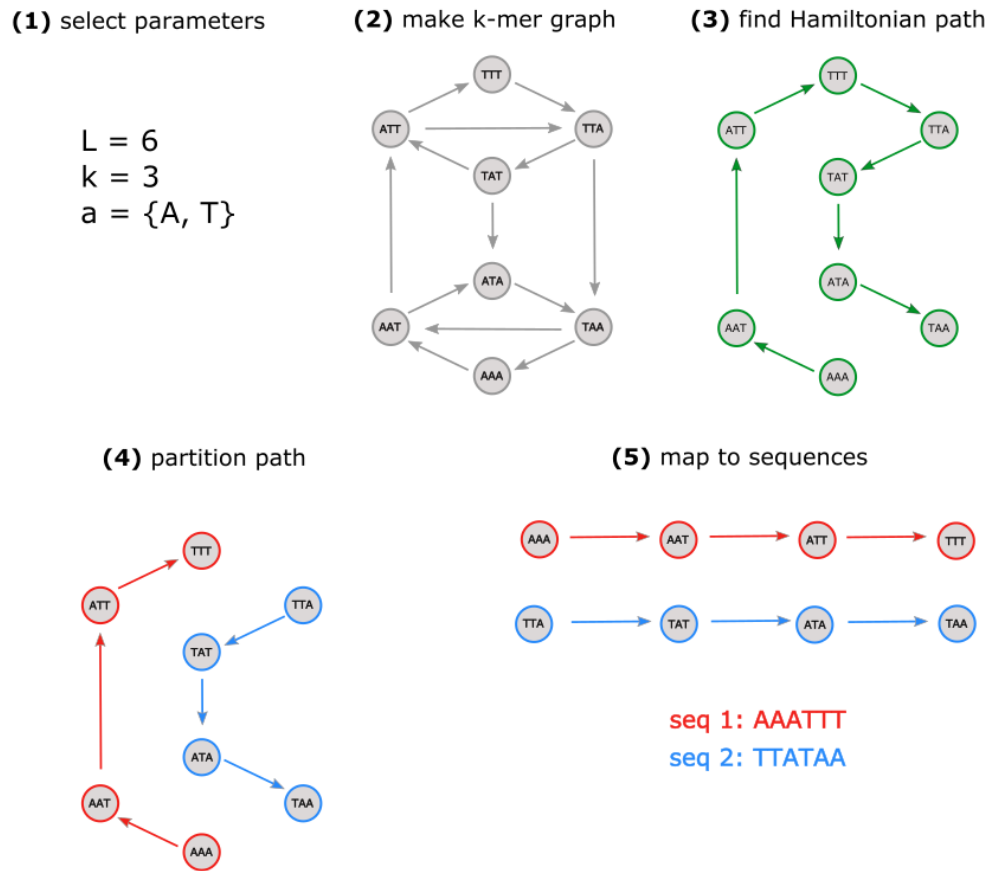

**Fig. 1.** Workflow of graph-based sequence design algorithm. (1) Select length of desired sequences  $L$ , length of prevented substrings (SSM constraint)  $k$ , and allowed alphabet  $a$ . (2) Represent sequence space using a k-mer graph. (3) Select a random Hamiltonian path in k-mer graph. (4) Partition the selected Hamiltonian path into fragments with  $L - k + 1$  nodes. (5) Map fragments to corresponding sequences.

ing its first symbol and appending a symbol, then there is a directed edge from  $k_1$  to  $k_2$ .

On a k-mer graph, a length  $L$  sequence can be represented as a path over  $L - k + 1$  nodes. The traversed nodes will correspond to each k-mer that appears in the sequence. A set of sequences that can be represented as non-intersecting paths on a k-mer graph share no common k-mers, and thus satisfy SSM for the corresponding  $k$ . This points toward a method for generating sequences that implicitly satisfy SSM for length  $k$ : one can simply select several non-intersecting paths on a k-mer graph. One way to produce non-intersecting paths on a graph is to take a single self-avoiding walk, and then partition this walk into multiple non-intersecting paths. The longest possible self-avoiding walks on a graph are Hamiltonian paths, which visit every node of the graph exactly one time. A partitioned Hamiltonian path will result in sequences that fully occupy k-mer space, and thus yield maximally sized orthogonal sequence libraries.

In SeqWalk, we apply a recently discovered mathematical technique for traversing de Bruijn graphs, which yields Hamiltonian paths in  $O(1)$  time and memory per node (13), to efficiently and scalably design orthogonal sequence libraries. The main SeqWalk algorithm is remarkably simple: our implementation requires less than 100 lines of code, including output formatting (Supplemental File 1).

**Performance benchmarks.** To understand the practical relevance of the high efficiency of SeqWalk, we perform benchmark analysis against a traditional pairwise comparison approach for designing SSM satisfying sequence libraries, which is theoretically equivalent to the network elimination algorithms used in existing orthogonal sequence design methods (Supplemental File 2) (4, 6). We find that SeqWalk produces a larger number of sequences in less time than convergence of the pairwise comparison method for every tested design problem, with performance gains empirically increasing for design tasks of increasing complexity (Fig. 2). In the case of SSM  $k = 8$  for 20nt sequences, SeqWalk produces more than 10 times as many orthogonal sequences as the pairwise algorithm, in approximately 1% of the computation time (Supplemental File 2).

The largest published library of orthogonal sequences consists of approximately  $2.4 \times 10^5$  25nt sequences satisfying SSM for  $k = 12$ . The library was designed with a pairwise sequence comparison algorithm, and used high performance computing tools (6). Using SeqWalk, we are able to generate over  $1.2 \times 10^6$  orthogonal 25nt DNA sequences satisfying SSM for  $k = 12$ , in less than 17 seconds on a single CPU core (Supplemental File 1). While previous methods subsample sequence space for candidate sequences (4, 6), SeqWalk exhaustively traverses sequence space, with a candidate se-

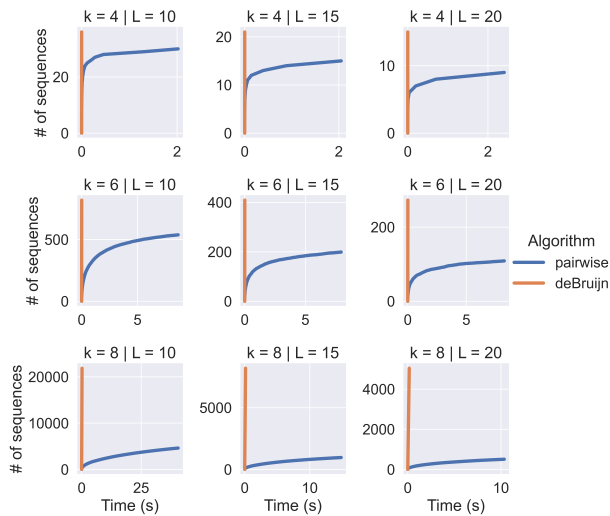

**Fig. 2.** Performance of graph-based sequence design method (orange) in comparison to method involving pairwise crosstalk evaluations (blue), for several design problems. Each plot shows trajectories of the number of sequences designed in wall clock time for each method, averaged over 10 trials (see Supplement for details). Plots on the same row have the same  $k$  value (length of prevented substrings), and plots on the same column have the same  $L$  value (sequence length). All plots are for the case of a 4 letter alphabet.

library. If there existed a larger library of SSM-satisfying sequences, it would use a larger number of  $k$ -mers, and thus would repeat  $k$ -mers, and not satisfy SSM. A more formal statement and proof can be found in Supplementary note 6. Building on fundamental results about de Bruijn graphs (11), we can obtain a closed form expression for the number of sequences in SeqWalk libraries under different design parameters. For alphabet size  $m$ , sequence length  $L$ , and SSM constraint  $k$ , the number of possible orthogonal sequences  $N$  is the number of nodes in the  $k$ -mer graph divided by the number of nodes required to represent a sequence of length  $L$ . More precisely,

$$N = \left\lfloor \frac{m^k}{L - k + 1} \right\rfloor$$

By solving the inverse problem given a desired library size of  $N_d$ , sequence length  $L$ , and alphabet size  $m$ , we can choose the smallest  $k$  such that  $N \geq N_d$ . Designing a library using the resulting  $k$  value yields a maximally orthogonal library with the desired number of sequences.

Additionally, we can estimate the size of SeqWalk libraries after downstream filtering. For example, we can place lower bounds on the number of sequences present after a filtering for a specific sequence pattern of length  $p < k$ . The number of  $k$ -mers containing a specific pattern of length  $p$  is

$$K_p = (k - p + 1) * m^{k-p}$$

where  $m$  is the size of the alphabet. Since no  $k$ -mer appears in more than one sequence in the library, we must remove at most  $K_p$  sequences from our library to remove all sequences containing a pattern of length  $p$ . As such, the size of the filtered library,  $N_p$ , is

$$N_p \geq N - K_p$$

Such lower bounds are simple to determine for practically relevant pattern constraints, such as the prevention of homopolymeric regions (Fig S6). Additionally, we derive a lower bound on the size of SeqWalk libraries upon filtering for orthogonality with reverse complements (Supplementary note 4). For the case of 3-letter libraries with odd  $k$ , we show that the size of a SeqWalk library that satisfies orthogonality with reverse complements,  $N_{rc}$ , can be bounded by

$$N_{rc} \geq N - 2^{k-1}$$

The size of SeqWalk libraries under GC content constraints is not as easily determined analytically. However, empirical results show that SeqWalk libraries have consistent distributions of GC content, resembling the binomial distribution expected of uniformly random sequences (Supplementary note 2). As such, these distributions can be used to estimate the size of SeqWalk libraries under GC content constraints.

**Implementation as a software tool.** We have implemented the SeqWalk algorithm and additional filtering tools in a pip distributed Python package (`seqwalk`, source code available at [github.com/storyetfall/seqwalk](https://github.com/storyetfall/seqwalk), documented at [seqwalk.readthedocs.io](https://seqwalk.readthedocs.io)). Additionally,

141 quence pool 9 orders of magnitude larger than previous work.

142 **Sequence design under additional constraints.** In many  
143 applications, there are additional constraints to orthogonal  
144 sequence libraries beyond limitations on off-target binding.  
145 One common constraint is the prevention of crosstalk with re-  
146 verse complements of sequences in the library. For sequence  
147 design under this constraint, SeqWalk integrates two efficient  
148 algorithms: a filtering-based method for 3-letter libraries, and  
149 an adaptation of the Hierholzer algorithm (14) for 4-letter li-  
150 braries (Supplementary note 4).

151 SeqWalk design can also consider other common constraints  
152 such as requiring GC content within a window, absence of  
153 specific sequence patterns, and the absence of significant sec-  
154 ondary structure. We provide efficient algorithms for filter-  
155 ing SeqWalk libraries for these characteristics (Supplemen-  
156 tary notes 2, 3, 4, 5). We find that 3-letter SeqWalk li-  
157 braries are particularly amenable to such filtering, as they  
158 have sequences with lower variance in GC content (Fig. S4),  
159 low prevalence of secondary structure (Fig. S5) and little  
160 crosstalk with reverse complements (Supplementary note 4).

161 **Theoretical results.** Typical approaches to orthogonal se-  
162 quence design provide no theoretical guarantees of optimal-  
163 ity. The theoretical tractability of SeqWalk allows us to de-  
164 sign sequence libraries that are provably maximally sized or  
165 provably maximally orthogonal.

166 To our knowledge, SeqWalk is the first orthogonal sequence  
167 design algorithm that is provably guaranteed to yield max-  
168 imally sized SSM satisfying sequence libraries. SSM-  
169 satisfying sequence libraries designed by the partitioning of a  
170 Hamiltonian path (such as in SeqWalk) are maximally sized.  
171 This can be trivially proven by contradiction, by noting that  
172 every possible  $k$ -mer in the sequence space appears in the

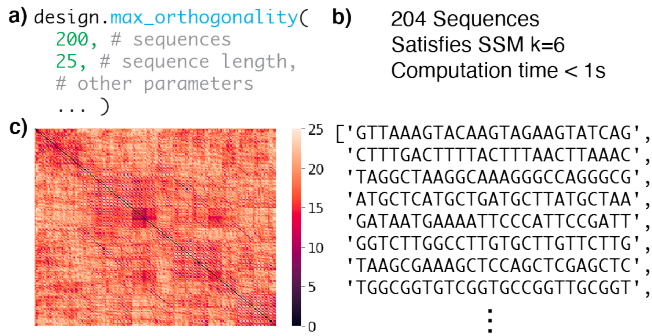

**Fig. 3.** Depiction of seqwalk software package. (a) Example design code which produces a library of at least 200 25nt sequences with maximal orthogonality according to the SSM heuristic. (b) Output of example design code. (c) Crosstalk analysis of designed library, using Hamming distance. Each row/column represents a sequence, and each entry is colored by Hamming distance.

quences. In modern molecular biology and bioengineering, where the design of synthetic biological systems is fundamentally intertwined with the characterization of natural biological systems, there is growing interest in sequence representations amenable to design tasks (16, 17). However, outside of highly specialized applications (18, 19), graph representations of sequences are far less commonly used in design contexts. With SeqWalk, we demonstrate that graph-based sequence representations enable massive efficiency improvements in orthogonal sequence design. We are optimistic that graph representations of sequence space can similarly enable efficient solutions to other biological sequence design problems.

#### ACKNOWLEDGEMENTS

We thank Jocelyn Kishi, Tatiana Brailovskaya, and Erik Winfree for thoughtful discussions. We thank Xiaokang Lun and Ningning Liu for feedback on the manuscript. We thank the Jupyter Project for maintaining open-source computational tools.

#### Bibliography

1. Sinem K Saka, Yu Wang, Jocelyn Y Kishi, Allen Zhu, Yitian Zeng, Wenxin Xie, Koray Kirli, Clarence Yapp, Marcelo Cicconet, Brian J Beliveau, Sylvain W Lapan, Siyuan Yin, Millicent Lin, Edward S Boyden, Pascal S Kaeser, German Pihan, George M Church, and Peng Yin. Immuno-SABER enables highly multiplexed and amplified protein imaging in tissues. *Nat. Biotechnol.*, 37(9):1080–1090, September 2019.
2. Allon M Klein, Linas Mazutis, Ilke Akartuna, Niren Tallapragada, Adrian Veres, Victor Li, Leonid Peshkin, David A Weitz, and Marc W Kirschner. Droplet barcoding for single-cell transcriptomics applied to embryonic stem cells. *Cell*, 161(5):1187–1201, May 2015.
3. Z J Gartner and D R Liu. The generality of DNA-templated synthesis as a basis for evolving non-natural small molecules. *J. Am. Chem. Soc.*, 123(28):6961–6963, July 2001.
4. Arturo Casini, Georgia Christodoulou, Paul S Freemont, Geoff S Baldwin, Tom Ellis, and James T MacDonald. R2oDNA designer: computational design of biologically neutral synthetic DNA sequences. *ACS Synth. Biol.*, 3(8):525–528, August 2014.
5. Timothy C Yu, Winnie L Liu, Marcia S Brinck, Jessica E Davis, Jeremy Shek, Grace Bower, Tal Einaiv, Kimberly D Insigne, Rob Phillips, Sriram Kosuri, and Guillaume Urtecho. Multiplexed characterization of rationally designed promoter architectures deconstructs combinatorial logic for IPTG-inducible systems. *Nat. Commun.*, 12(1):325, January 2021.
6. Qikai Xu, Michael R Schlabach, Gregory J Hannon, and Stephen J Elledge. Design of 240,000 orthogonal 25mer DNA barcode probes. *Proc. Natl. Acad. Sci. U. S. A.*, 106(7):2289–2294, February 2009.
7. A Marathe, A E Condon, and R M Corn. On combinatorial DNA word design. *J. Comput. Biol.*, 8(3):201–219, 2001.
8. Constantine G Evans and Erik Winfree. DNA sticky end design and assignment for robust algorithmic self-assembly. In *DNA Computing and Molecular Programming*, pages 61–75. Springer International Publishing, 2013.
9. N C Seeman. De novo design of sequences for nucleic acid structural engineering. *J. Biomol. Struct. Dyn.*, 8(3):573–581, December 1990.
10. D D Shoemaker, D A Lashkari, D Morris, M Mittmann, and R W Davis. Quantitative phenotypic analysis of yeast deletion mutants using a highly parallel molecular bar-coding strategy. *Nat. Genet.*, 14(4):450–456, December 1996.
11. T van Aardenne-Ehrenfest and Nicolaas Govert de Bruijn. Circuits and trees in oriented linear graphs. In *Classic papers in combinatorics*, pages 149–163. Springer, 2009.
12. Joe Sawada, Aaron Williams, and Dennis Wong. A surprisingly simple de bruijn sequence construction. *Discrete Math.*, 339(1):127–131, January 2016.
13. Joe Sawada, Aaron Williams, and Dennis Wong. A simple shift rule for k-ary de bruijn sequences. *Discrete Math.*, 340(3):524–531, March 2017.
14. Hierholzer and Wiener. Über die möglichkeit, einen linienzug ohne wiederholung und ohne unterbrechung zu umfahren. *Math. Ann.*, 1873.
15. R M Idury and M S Waterman. A new algorithm for DNA sequence assembly. *J. Comput. Biol.*, 2(2):291–306, 1995.
16. Johannes Linder and Georg Seelig. Fast differentiable DNA and protein sequence optimization for molecular design. May 2020.
17. Eli N Weinstein, Alan N Amin, Will Grathwohl, Daniel Kassler, Jean Disset, and Debora S Marks. Optimal design of stochastic DNA synthesis protocols based on generative sequence models. October 2021.
18. S Roweis, E Winfree, R Burgoyne, N V Chelyapov, M F Goodman, P W Rothemund, and L M Adleman. A sticker-based model for DNA computation. *J. Comput. Biol.*, 5(4):615–629, 1998.
19. Yaron Orenstein and Bonnie Berger. Efficient design of compact unstructured RNA libraries covering all k-mers. *J. Comput. Biol.*, 23(2):67–79, February 2016.
20. Robert M Dirks, Milo Lin, Erik Winfree, and Niles A Pierce. Paradigms for computational nucleic acid design. *Nucleic Acids Res.*, 32(4):1392–1403, February 2004.

we have developed an interactive, code-free, web-based SeqWalk interface in a publicly accessible Google Colaboratory notebook (link on `seqwalk.readthedocs.io`). We envision the use of `seqwalk` as a part of a sequence design pipeline, with downstream filtering (experimental validation, genomic homology filtering, etc.) as necessary for specific application contexts. Due to the simplicity of the underlying algorithms, we expect that others can implement our design method in other languages and development environments, and modify it as necessary.

#### Discussion

We have presented SeqWalk, a method for efficiently producing maximally-sized orthogonal sequence libraries which are amenable to theoretical analyses. SeqWalk enables the design of orthogonal sequence libraries of unprecedented size, with theoretical guarantees on maximality.

While SeqWalk is applicable to any orthogonal sequence design problem, the use of the SSM heuristic makes it more naturally applicable to certain kinds of design problems. In particular, SeqWalk is well suited for problems where nuanced biophysical properties (i.e. exact  $\Delta G$ , strand displacement kinetics) need not be tightly controlled. We expect that SeqWalk will be valuable for the rapidly growing class of high-throughput biological methods that use synthetic DNA sequences as barcodes for different biomolecular features (i.e. samples, cells, protein targets, plasmids, etc.). Using SeqWalk to maximize the size of orthogonal sequence libraries can, in principle, increase the number of features that can be barcoded in such methods.

Additionally, the theoretical guarantees of SeqWalk libraries can be used to guide design choices in experimental method development. Using the results derived in this paper, one can understand the tradeoffs between design parameters and orthogonal sequence library size.

In the early 1990s, graph representations of biological sequences revolutionized the field of genomics, dramatically improving the quality and efficiency of de novo genome assembly (15). Since then, graph representations of sequences have become widespread as descriptive tools in bioinformatics, used to reconstruct naturally occurring biological se-

## Supplementary Note 1: Defining crosstalk

The words "orthogonality" and "crosstalk" are used frequently in molecular bioengineering, without very precise definitions. Here, we will try to be more precise about what we mean.

We consider two sequences (A, B) to have crosstalk if they can stably hybridize with each other's reverse complements. In other words, if a complex between A and B\*, or A\* and B is likely to form, we consider A and B to have crosstalk.

If we think of A and B as probes, with A\* and B\* being their respective targets, we consider crosstalk to be the binding of a probe to an incorrect target. We do not by default consider binding between A and B to be crosstalk.

For many, but not all, applications, this is a sufficient characterization of crosstalk. In the case of multiplexed imaging, only a single probe (referred to as imager in the multiplexed imaging literature) is present in a sample at a given time (1). As such, we need not consider binding between probes. Analogously, in DNA similarity search, a single "query" probe is used to bind "target" strands, so binding between probe strands is not necessary.

In some applications, a stronger definition of crosstalk, including binding between probe strands, is necessary. For example, in single stranded tile self assembly, a pool of single strands, including "probes" and "targets" will be in well mixed solution. As such, binding between all strands must be considered crosstalk.

We consider this to be orthogonality including reverse complements, where A and B have crosstalk if any pair of A, A\*, B, B\* have significant binding (other than the desired A with A\*, and B with B\*). Sequence design under this stronger orthogonality constraint is discussed in the supplementary note on orthogonality with reverse complements, and the main text section on sequence design under additional constraints.

## Supplementary Note 2: GC content distributions in SeqWalk libraries

While we do not have a rigorous proof of this, we find empirically that the distributions of GC content in SeqWalk libraries is similar to that of totally random sequences. We expect, in a 4 letter alphabet, to have GC content that is binomially distributed with  $p=0.5$  and  $n=L$  (where  $L$  is the sequence length). In a 3 letter alphabet (ACT or AGT) we expect to have GC content binomially distributed with  $p = \frac{1}{3}$  and  $n = L$ .

The variance of a binomial is  $\sigma^2(n, p) = p * (1 - p) * n$ , with  $p \in [0, 1]$ . Since  $p * (1 - p)$  is globally maximized for  $p = 0.5$ , the variance of GC content is highest for the case of a 4 letter alphabet. This is in line with empirical results, shown below and in Supplemental File W.

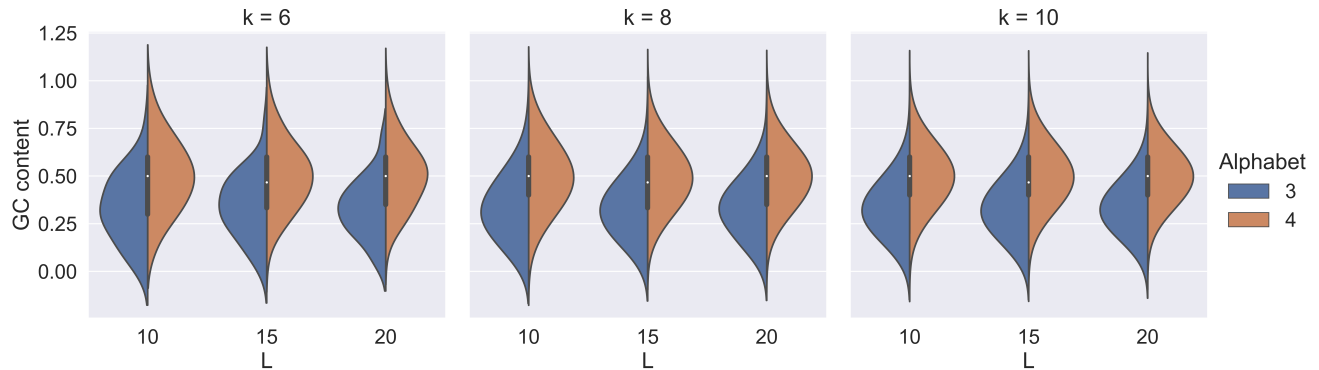

**Fig S4.** GC content distributions in various SeqWalk libraries. The 3 letter libraries are designed using {A, C, T}, while the 4 letter libraries use {A, C, T, G}. The code used to generate libraries can be found in Supplemental File X, the libraries can be found in Supplemental Files Y-Z, and the code used to make this plot can be found in Supplemental File W.

Since the GC content of 3 letter alphabet libraries is lower, a tighter window of GC content constraints can be used to obtain the same number of sequences (assuming that the extreme GC content sequences are those to be filtered out).

For filtering libraries for GC content, a naive algorithm, such as the one below, is efficient (constant time and memory in the size of the library).

```
function gc_filter(SeqWalk_library, gc_min, gc_max)
    filtered_library = []
    for seq in SeqWalk_library
        gc_content = gc(seq)
        if gc_min < gc_content < gc_max
            push!(filtered_library, seq)
        end
    end
end
```

### Supplementary Note 3: Secondary structure in SeqWalk libraries

Empirically, we find that secondary structure is very uncommon in SeqWalk libraries constructed with {A, C, T} libraries. We use percentage of paired bases in the MFE structure as a measure of secondary structure prevalence in a sequence. We are aware that this is not an ideal measure based on (20), but we use it as it is simple to compute and relatively agnostic to experimental context.

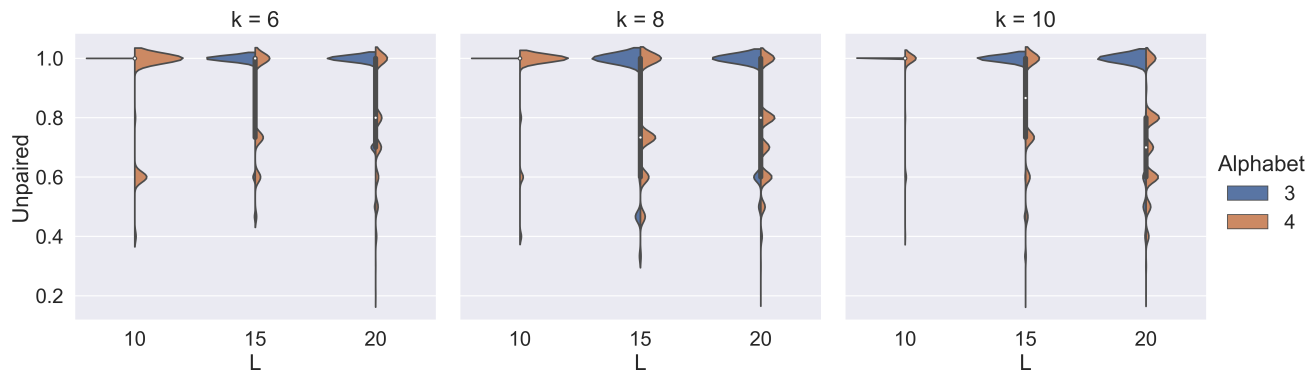

**Fig S5.** Distribution of fraction of unpaired bases in MFE structures in various SeqWalk libraries. An “Unpaired” value of 1 indicates no bound bases in the MFE structure of a sequence. The 3 letter libraries are designed using {A, C, T}, while the 4 letter libraries use {A, C, T, G}. The code used to generate libraries can be found in Supplemental File X, the libraries can be found in Supplemental Files Y-Z, and the code used to make this plot can be found in Supplemental File W.

To filter sequences for secondary structure, we can again use a naive algorithm, such as the one below, which is constant time and memory in the size of the library.

```
function SS_filter(SeqWalk_library, SS_threshold)

    filtered_library = []

    for seq in SeqWalk_library
        ss = NUPACK_MFE_Unpaired_fraction(seq)
        if ss < SS_threshold
            push!(filtered_library, seq)
        end
    end

end
```

## Supplementary Note 4: Orthogonality with Reverse Complements

For the case of 3-letter alphabets and odd SSM  $k$  values, we present an efficient algorithm for selecting maximally sized orthogonal libraries which prevent crosstalk with reverse complements of sequences in the library. Without loss of generality, let's consider the case of sequences constructed with an A, C, T library.

We seek to have a library which contains no repeated k-mers, and no k-mers whose reverse complement also appears in the library. K-mers containing "C" cannot have their reverse complements also appear in the library, since the library will not contain "G". So, we only need to consider k-mers composed entirely of "A" and "T".

In order to use k-mers whose reverse complement will not appear in the library, we seek partition all "AT" k-mers into two sets, such that the reverse complement of each sequence in a set appears in the other set.

In other words, if we consider a "Reverse Complement" graph, in which each node is a k-mer, and there is an edge between k-mers which are reverse complementary, we would like find a balanced bipartitioning of the graph.

Upon this partitioning, we can remove all sequences containing k-mers from one partition. Thus, the reverse complements of any k-mers that appear in the library will not be present.

For odd  $k$ , we can find such a partitioning by noting that the middle base in the k-mer will be different in its reverse complement.

For example in a 5mer, the third base will never be the same as the third base of its reverse complement. As such, we can find a bipartition of the Reverse Complement graph by dividing the nodes into two sets, where all nodes in one set have "A" as the middle base, and all nodes in the other set have "T" as the middle base.

Below is the pseudocode for efficiently filtering sequences in a odd  $K$ , 3 letter alphabet library, such that orthogonality with reverse complements is respected.

```
function filter_for_RCs(SeqWalk_library, k)
    to_remove = []
    middle = k/2 + 0.5
    for each sequence in library:
        for each kmer in sequence:
            if "C" in kmer:
                continue
            elif kmer[middle] == "A":
                push(to_remove, sequence)
            end
        end
    end
    return remove(SeqWalk_library, to_remove)
end
```

Using this algorithm, we can easily lower bound the size of a resulting library will be upon filtering. We know that there are  $2^k$  kmers consisting entirely of A and T. Half of these k-mers will have "A" as the middle base. At most, we will remove one sequence from the library for each kmer. As such, we can lowerbound the number of sequences upon reverse complementarity filtering,  $N_{rc}$  using

$$N_{rc} \geq N - 2^{k-1}$$

This theoretical result indicates that SeqWalk still produces relatively large sequence libraries upon such filtering. For example, for the case of 25nt barcodes with 3 letter code, SSM  $k = 13$ , and removal of reverse complements, we will have a sequence library with at least  $N_{rc} \geq \frac{3^{13}}{13} - 2^{12} = 1.18544 * 10^5$  sequences.

In the case of a four-letter alphabet, filtering is an untenable solution because we cannot constrain reverse complementary k-mers to AT sequences. Instead, we use a modification of the Hierholzer algorithm, in which we mark both the visited k-mer and its reverse-complement "visited" during traversal. This method requires keeping track of visited nodes, and as such is less time/memory efficient than the shift rule traversal. Our implementation can be found in the `adapted_hierholzer` function in the `generation` module of the `seqwalk` source code ([github.com/storyetfall/seqwalk](https://github.com/storyetfall/seqwalk))



## Supplementary Note 5: Preventing specific sequence patterns

423

We can place lower bounds on the number of sequences present after a filtering for a specific sequence pattern of length  $p < k$ . The number of  $k$ -mers containing a specific pattern of length  $p$  is

$$K_p = (k - p + 1) * m^{k-p}$$

where  $m$  is the size of the alphabet. Since no  $k$ -mer appears in more than one sequence in the library, we must remove at most  $K_p$  sequences from our library to remove all sequences containing a pattern of length  $p$ . As such, the size of the filtered library,  $N_p$ , is

$$N_p \geq N - K_p$$

Such lower bounds are simple to determine for practically relevant pattern constraints, such as the prevention of homopolymeric regions. 424

For example, we can consider the case of preventing 4G regions, as well as 4N (any of 4A, 4T, 4C, 4G) regions. To lower bound the number of sequences after removing all 4N regions, we can use 425

$$N_{4N} = N - (K_{4A} + K_{4T} + K_{4C} + K_{4G})$$

Below, we see plots of these bounds for various  $k$  and  $L$ . 426

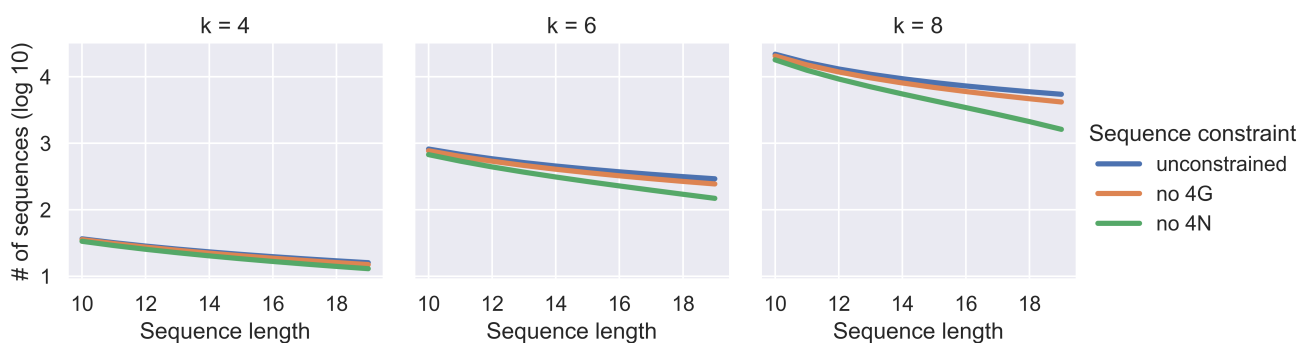

**Fig S6.** Lower bounds on library size for various design problems under different sequence pattern prevention constraints. In particular, we plot lower bounds for 4 letter SeqWalk libraries preventing 4G and preventing all 4N, in comparison to libraries with no pattern prevention constraints. 427

## 429 **Supplementary Note 6: Proof of maximality**

### 430 **A. Definitions.**

- 431 • Sequence library: set of sequences of length  $N$  over alphabet of size  $m$
- 432 • k-mer: subsequence of length  $k$
- 433 • SSM satisfied for length  $k$ : no subsequence of length  $k$  appears more than once, for  $k < N$
- 434 • Maximally sized SSM sequence library: A sequence library satisfying SSM for length  $k$  with size such that no larger  
435 sequence library satisfying SSM for length  $k$  exists.

436 **B. Lemma 1.** A maximally sized sequence library that satisfies SSM for length  $k$  contains at most  $m^k$  distinct k-mers.

437 **C. Proof of Lemma 1.** Assume for the sake of contradiction that there exists an SSM satisfying library for length  $k$ , which  
438 has  $K > m^k$  k-mers. Since there are only  $m^k$  possible k-mers, by the pigeonhole principle, at least one k-mer must appear  
439  $> 1$  times in the library. Since a k-mer appears more than once in the library, it does not satisfy SSM. We have arrived a  
440 contradiction.

441 **D. Theorem 1.** A sequence library generated by the partitioning of a Hamiltonian path in a  $k$  de Bruijn graph is a maximally  
442 sized SSM sequence library for length  $k$ .

443 **E. Proof of Theorem 1.** By definition, the number of k-mers in such a library is equal to the number of nodes in the corre-  
444 sponding de Bruijn graph. The number of nodes in the de Bruijn graph, by definition, is  $m^k$ . By Lemma 1, a maximally sized  
445 sequence library that satisfies SSM for length contains at most  $m^k$  k-mers. Thus, no larger SSM satisfying library exists.
